# Supplementary material for: The acute effects of higher versus lower load duration and intensity on morphological and mechanical properties of the healthy Achilles tendon: a randomized crossover trial
Source: Oxford University Press journal article supplement (doi:10.1242/jeb.243741), 2022-04-26
Supplement: jeb243741supp.pdf [file jeb243741supp.pdf]

**Table 1.** Type of physical activity with corresponding hours per week among the participants.

| Participant | Type of physical activity or exercise | Hours per week (number) |
|-------------|---------------------------------------|-------------------------|
| 1           | Football and basketball               | 5                       |
| 2           | Pilates and tap dancing               | 3                       |
| 3           | Basketball                            | 2                       |
| 4           | Rock climbing                         | 8                       |
| 5           | Gym classes and netball               | 4                       |
| 6           | Walking                               | 3                       |
| 7           | Football, basketball, and gym         | 10                      |
| 8           | Basketball                            | 2                       |
| 9           | Soccer, weightlifting, and basketball | 6                       |
| 10          | Soccer and volleyball                 | 10                      |
| 11          | Power lifting                         | 8-10                    |
| 12          | Skating                               | 30                      |
| 13          | Weightlifting                         | 5                       |
| 14          | None                                  | -                       |
| 15          | None                                  | -                       |
| 16          | Swimming                              | 2                       |
